# Supplementary figures and images for: Mechanisms of impact of web-based support and self-monitoring to augment and maintain physical activity levels: a qualitative study exploring participants’ interactions with the e-coachER, a web-based support programme for people attending exercise referral schemes
Source: HighWire-hosted journal article supplement (doi:10.1136/bmjopen-2023-080472), 2024-10-01

Appendix 1

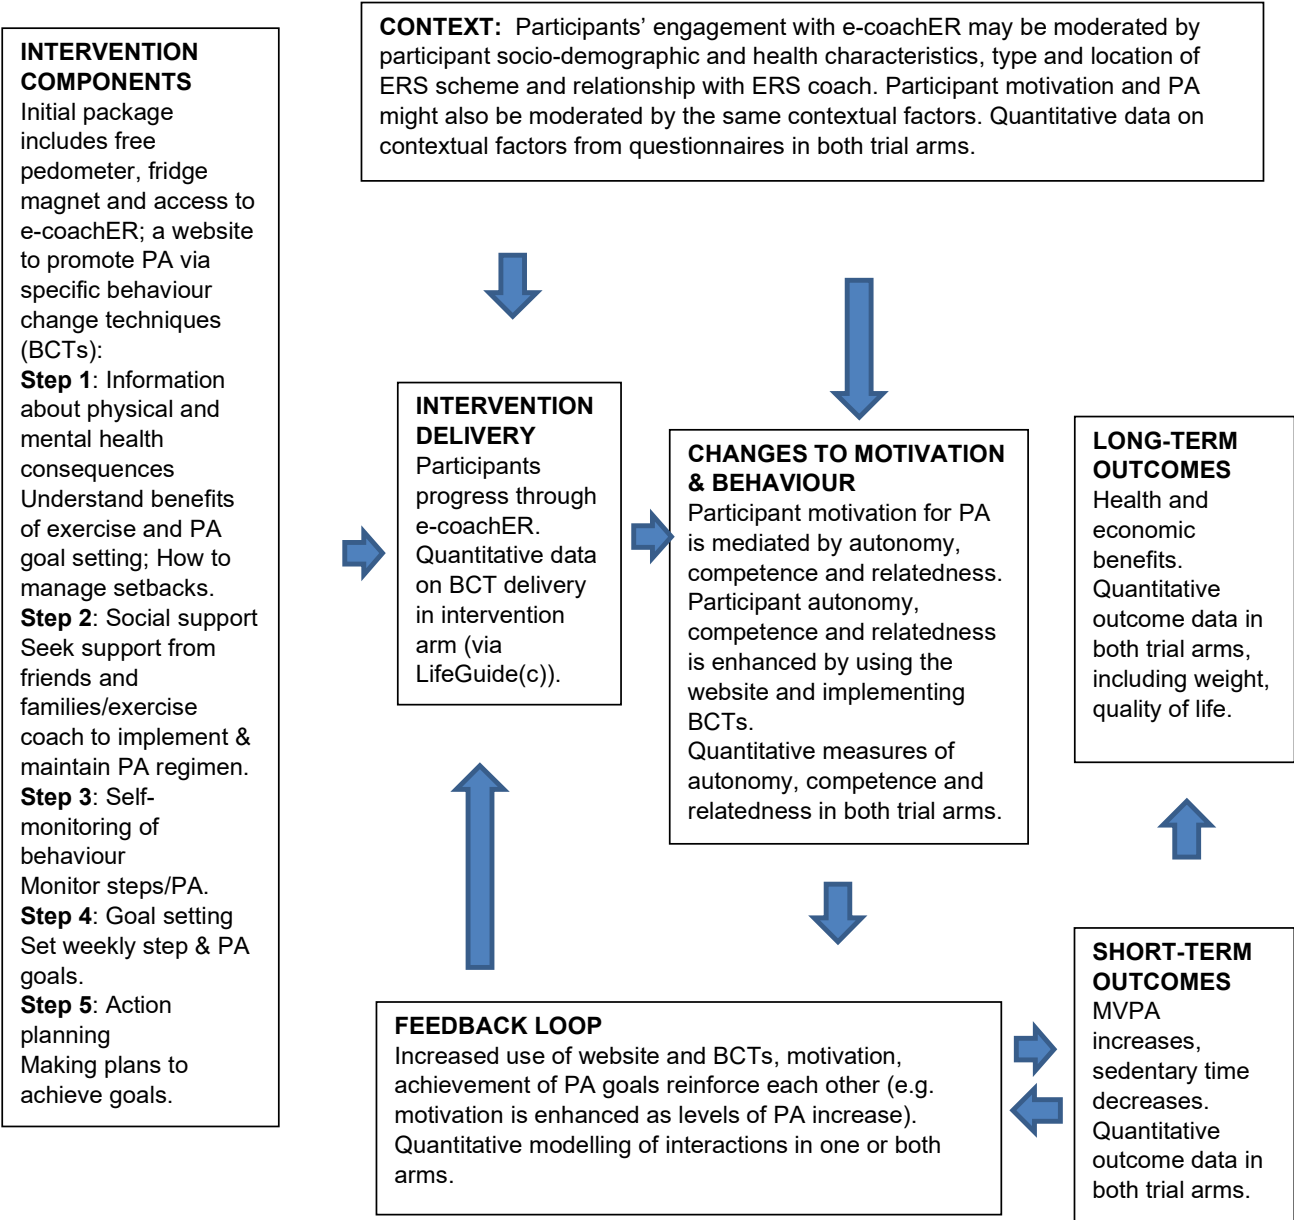

Supplement: bmjopen-2023-080472supp001_data_supplement.pdf [file bmjopen-2023-080472supp001_data_supplement.pdf]
